# Supplementary material for: Design and Development of Novel Urea, Sulfonyltriurea, and Sulfonamide Derivatives as Potential Inhibitors of Sphingosine Kinase 1
Source: MDPI journal article supplement (doi:10.3390/ph13060118), 2020-06-09
Supplement: s1 [file s1]

## Supplementary Materials

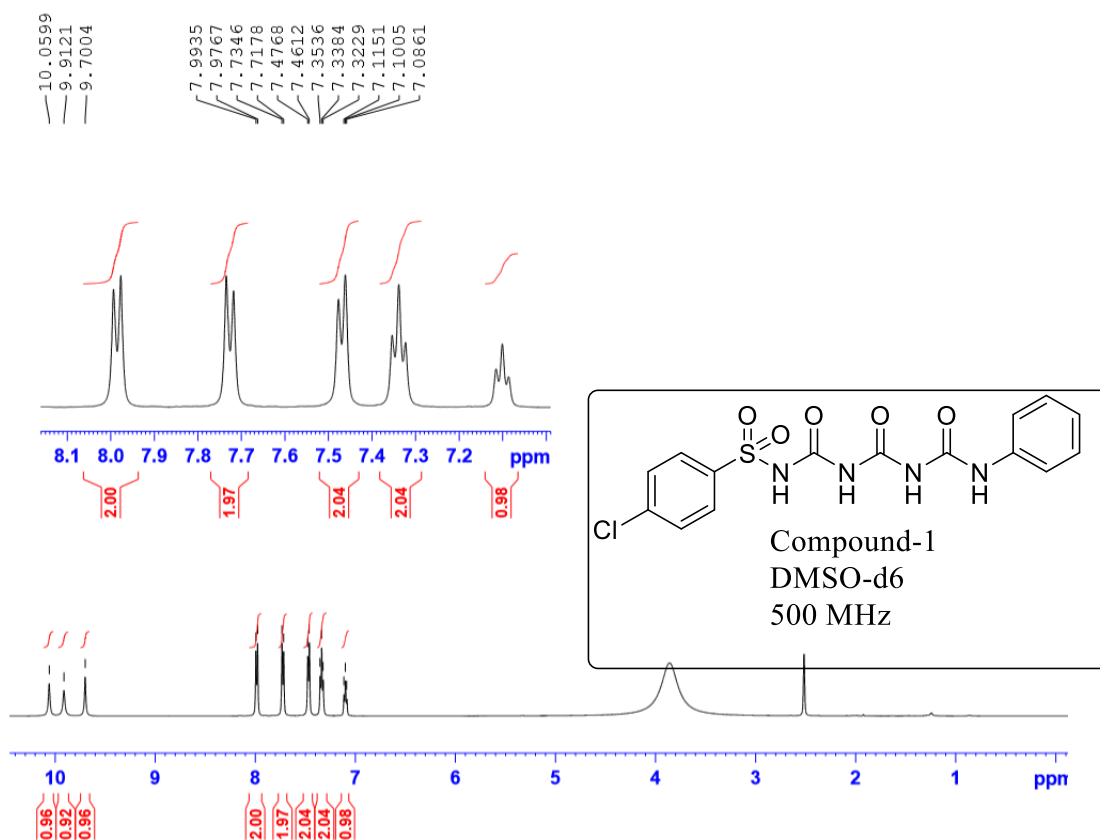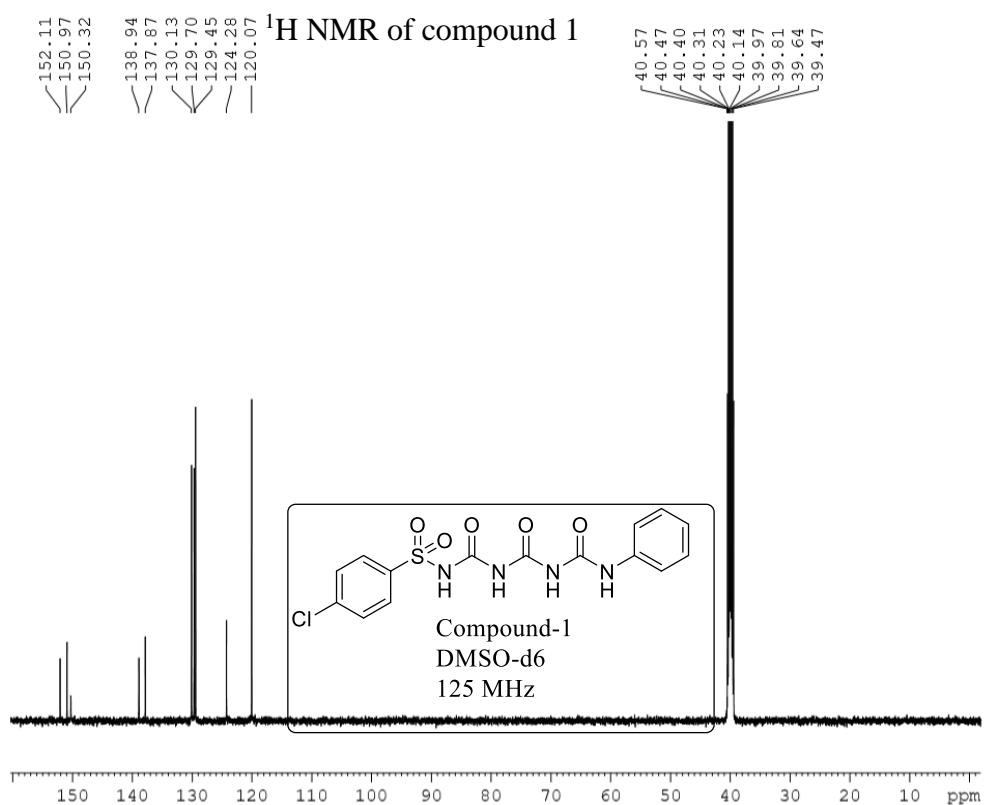

# <sup>13</sup>C NMR of compound 1

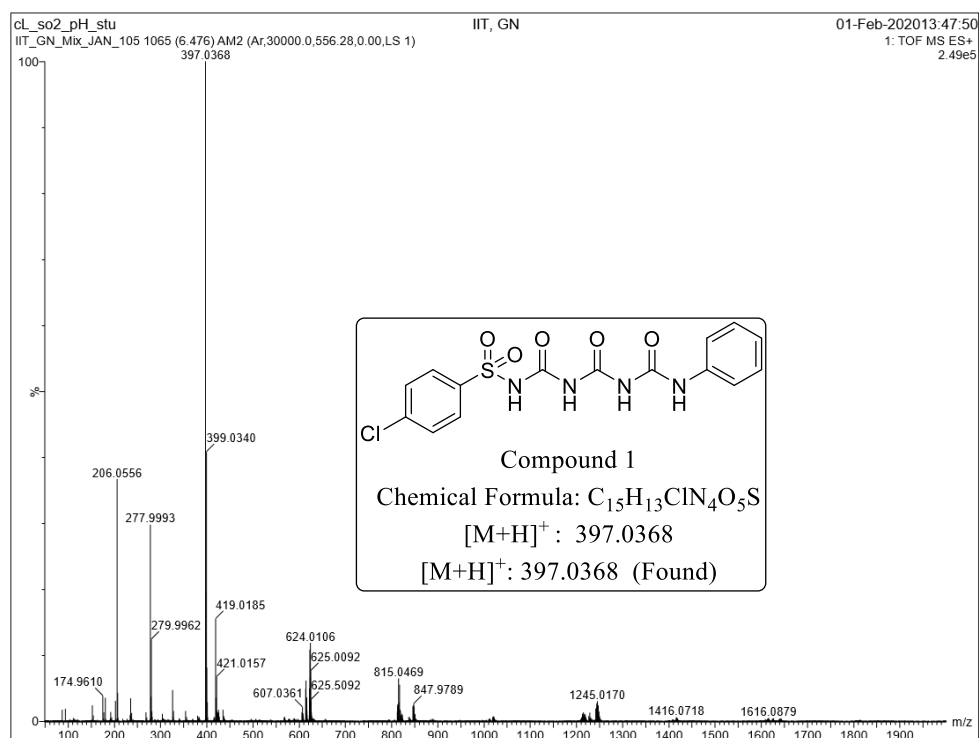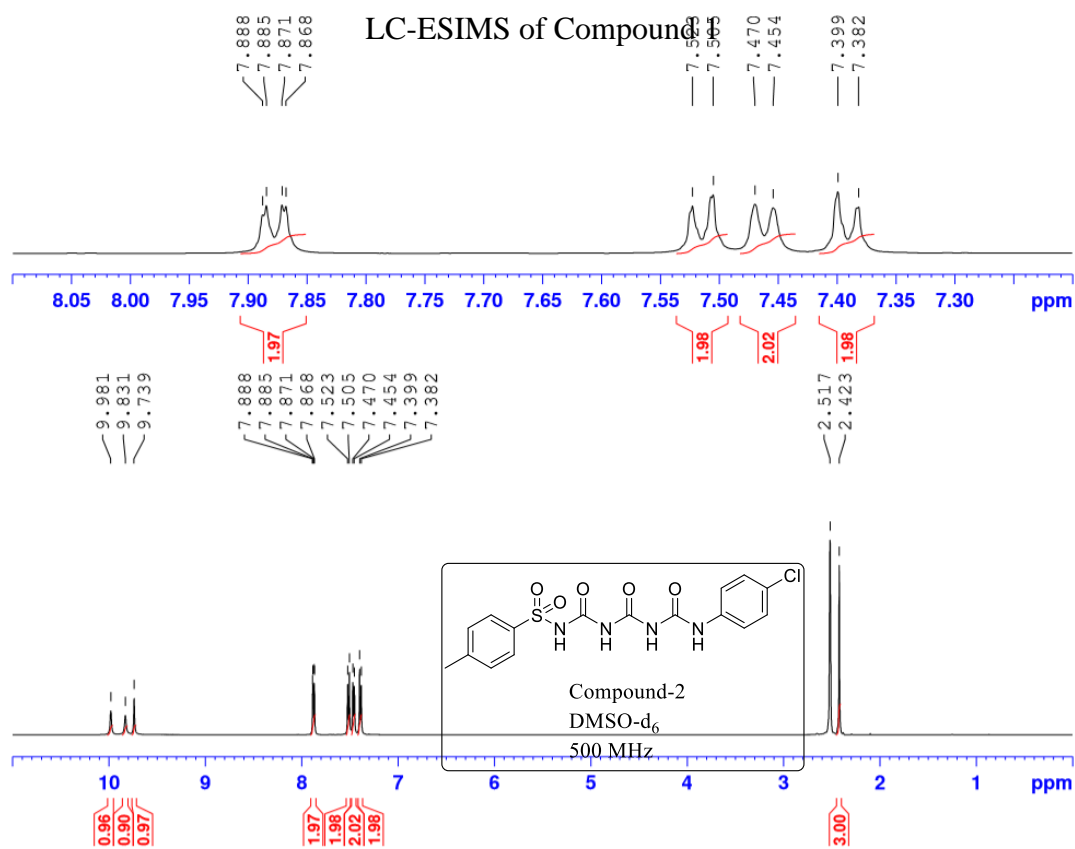

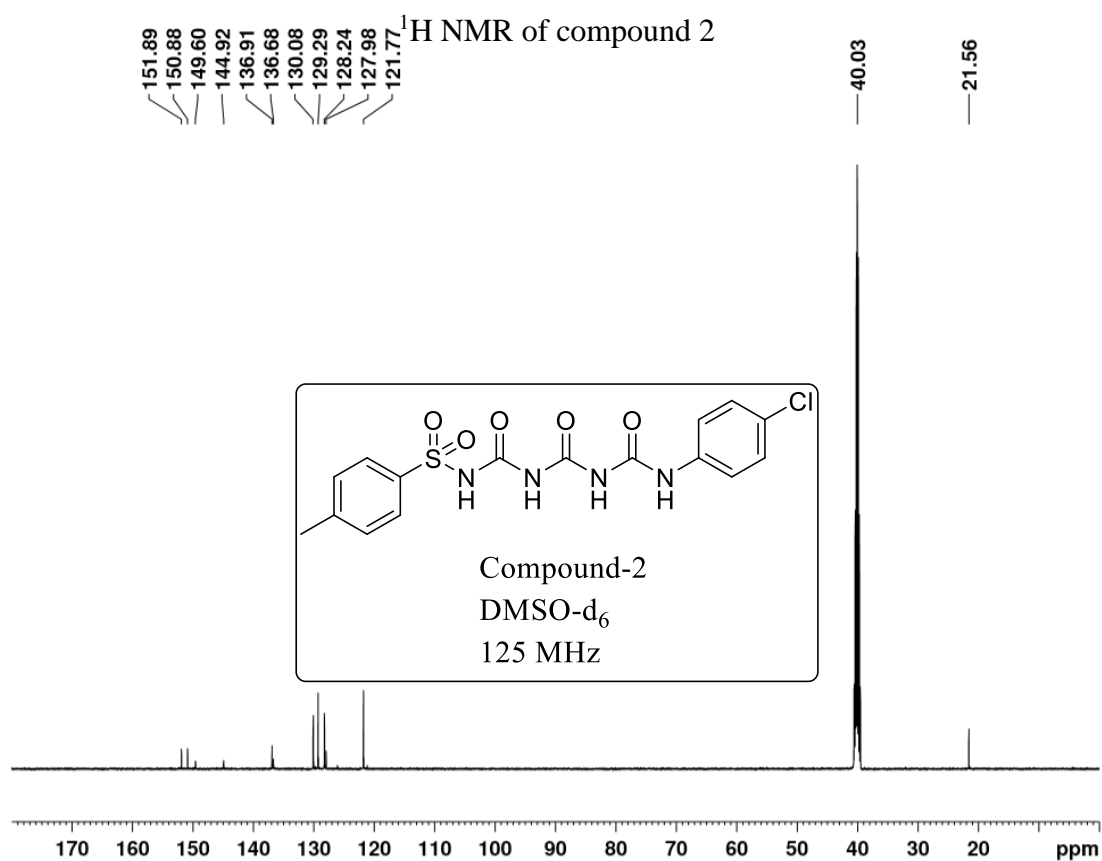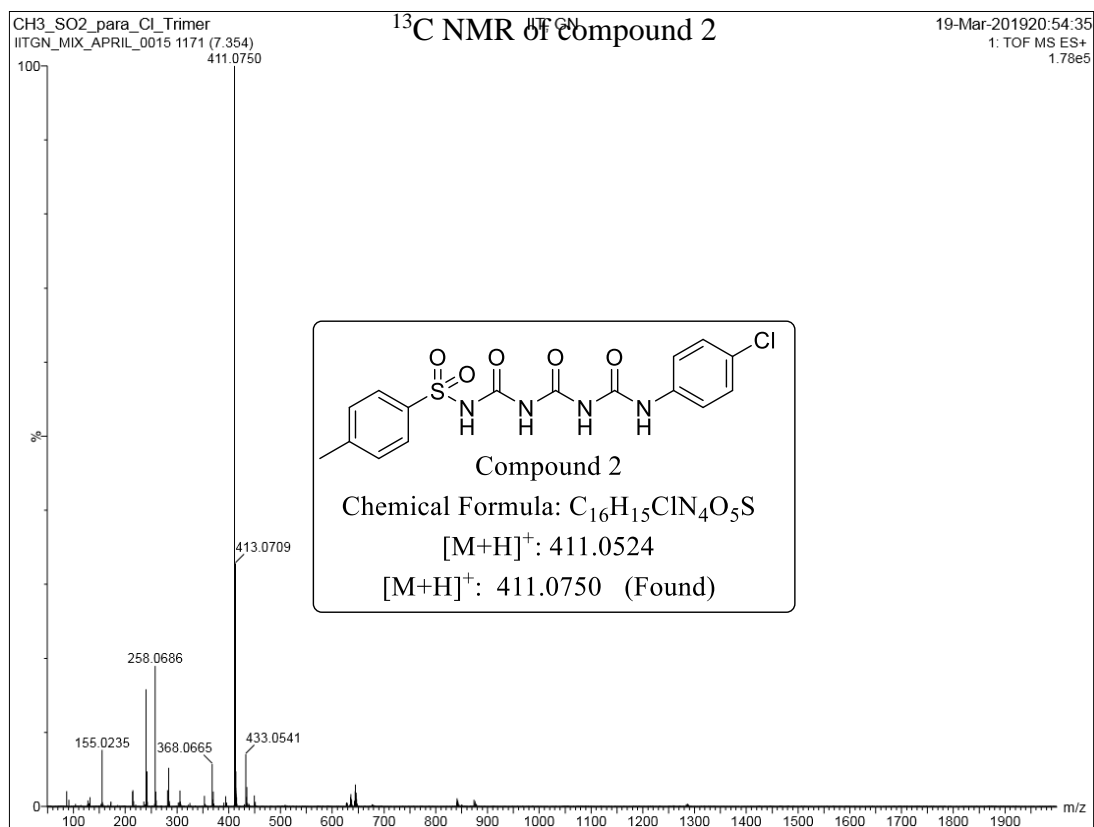

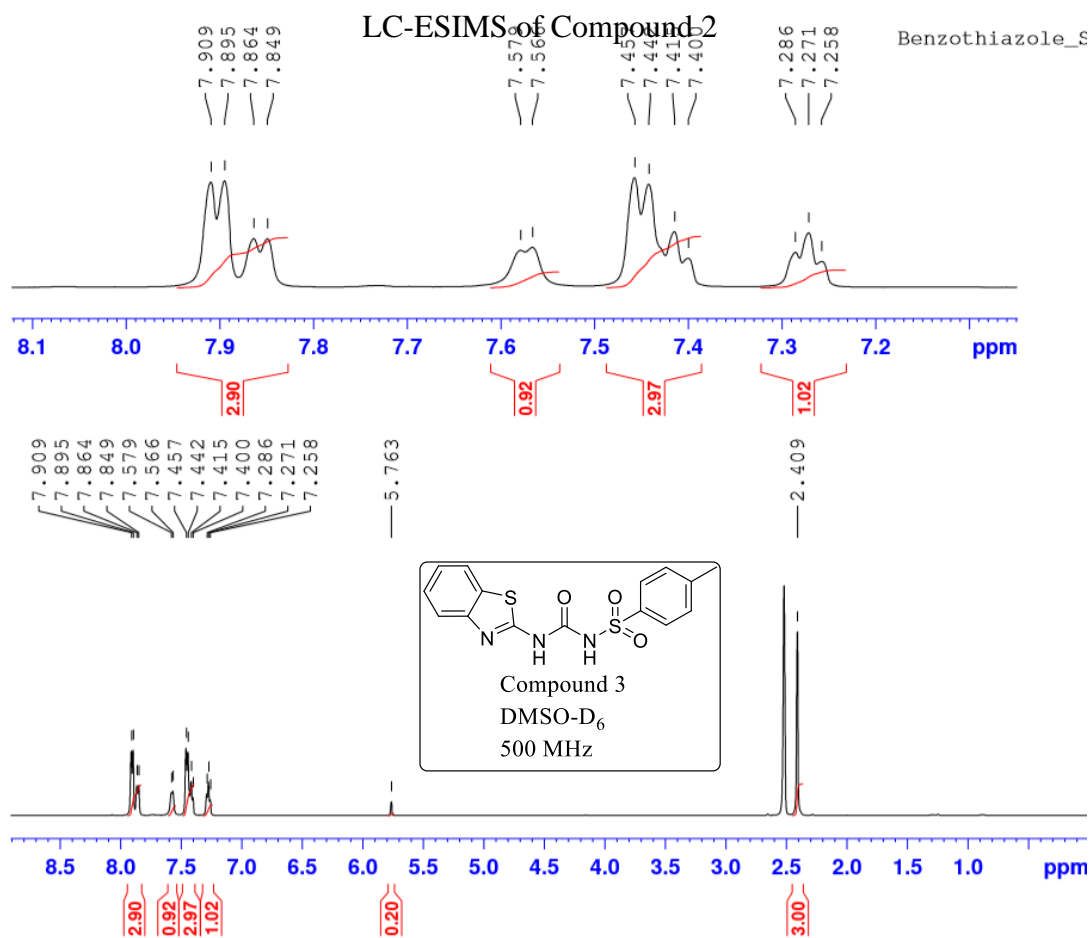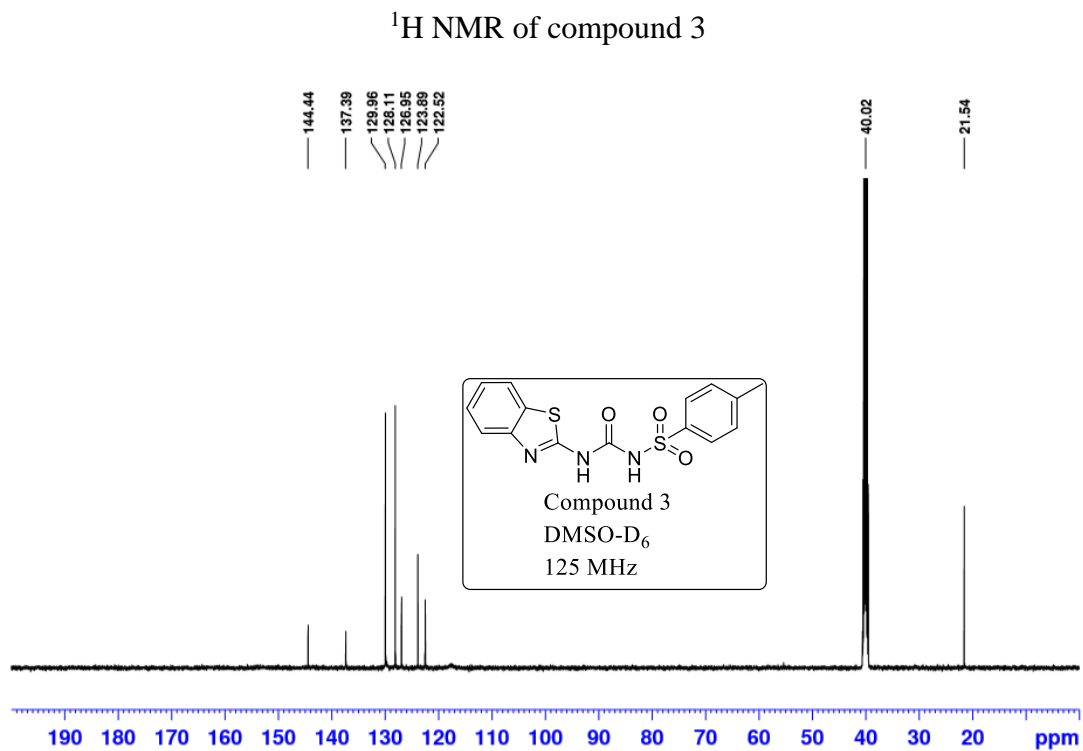

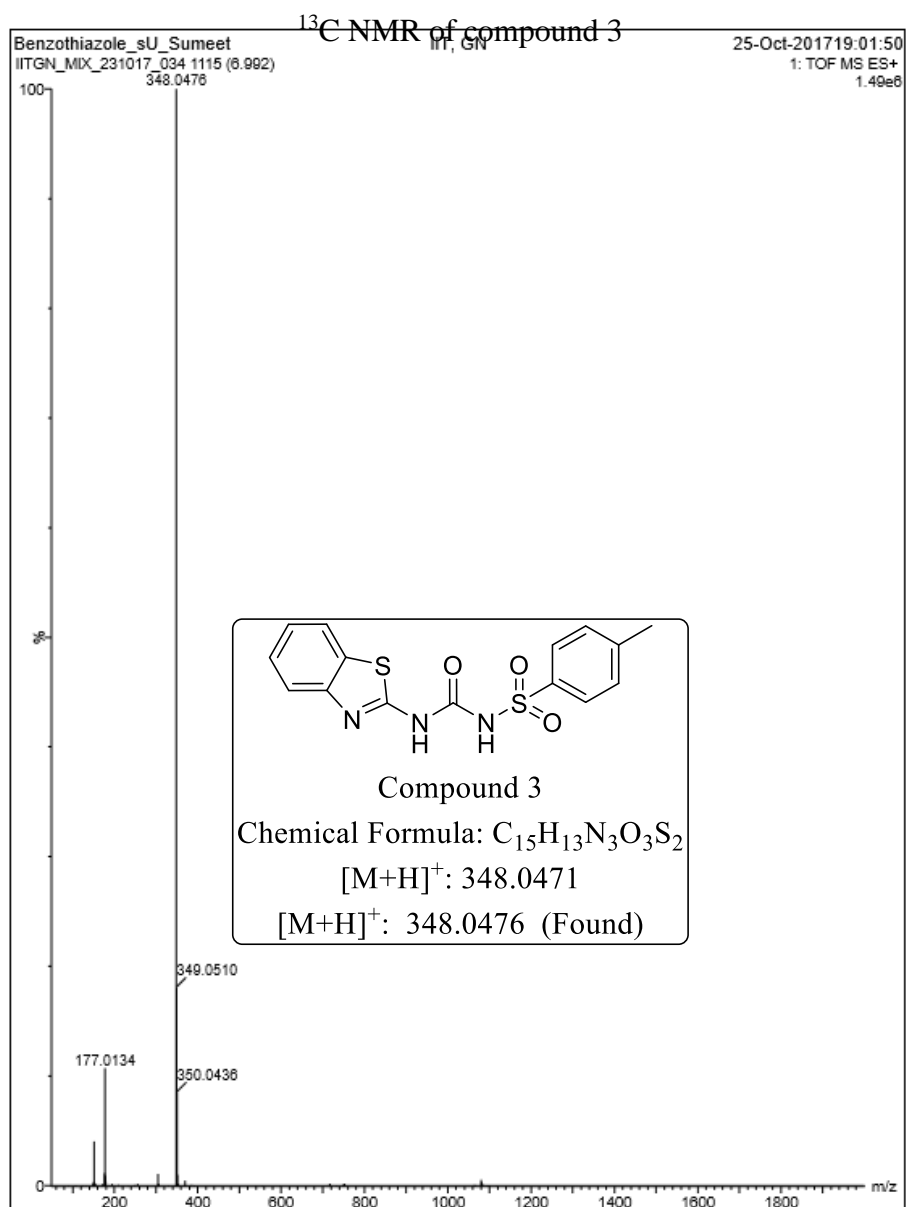

LC-ESIMS of Compound 3

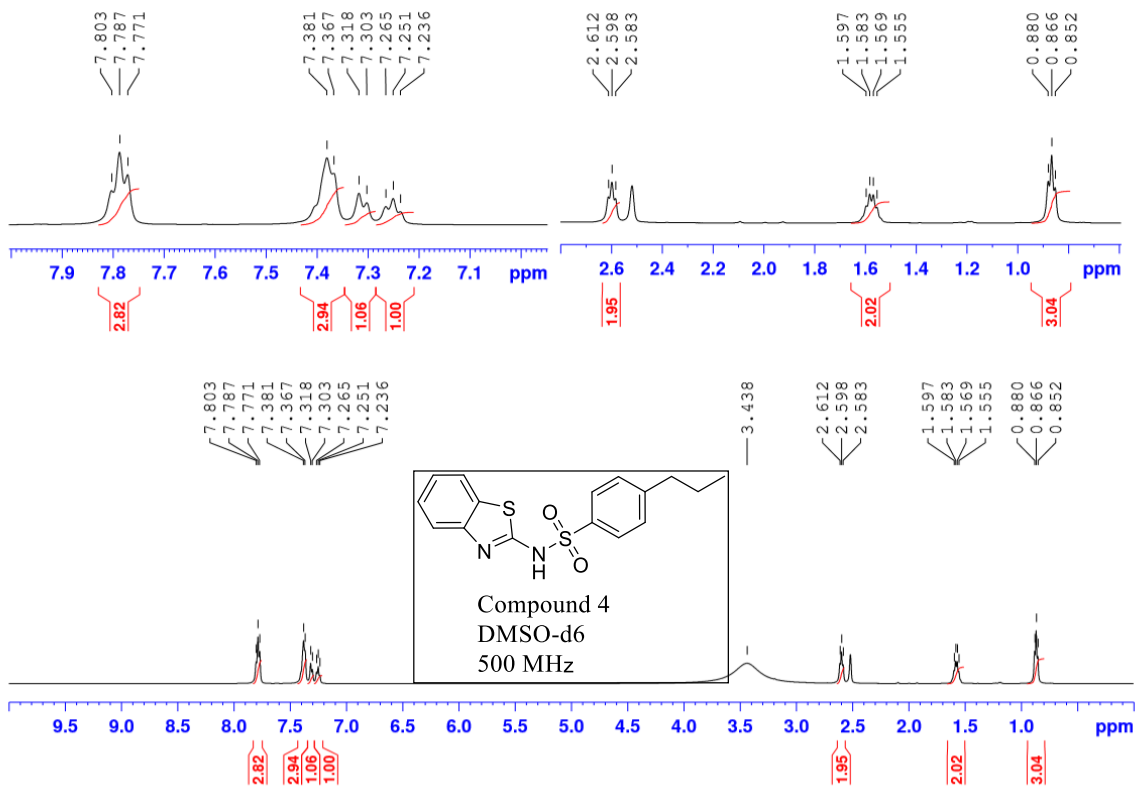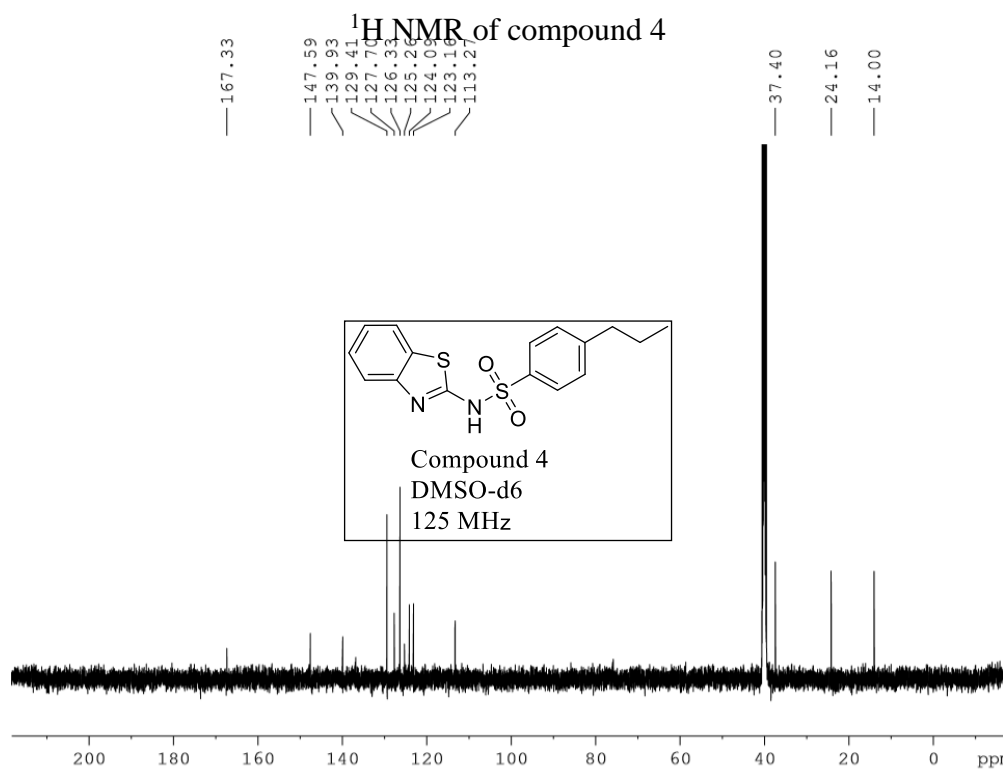

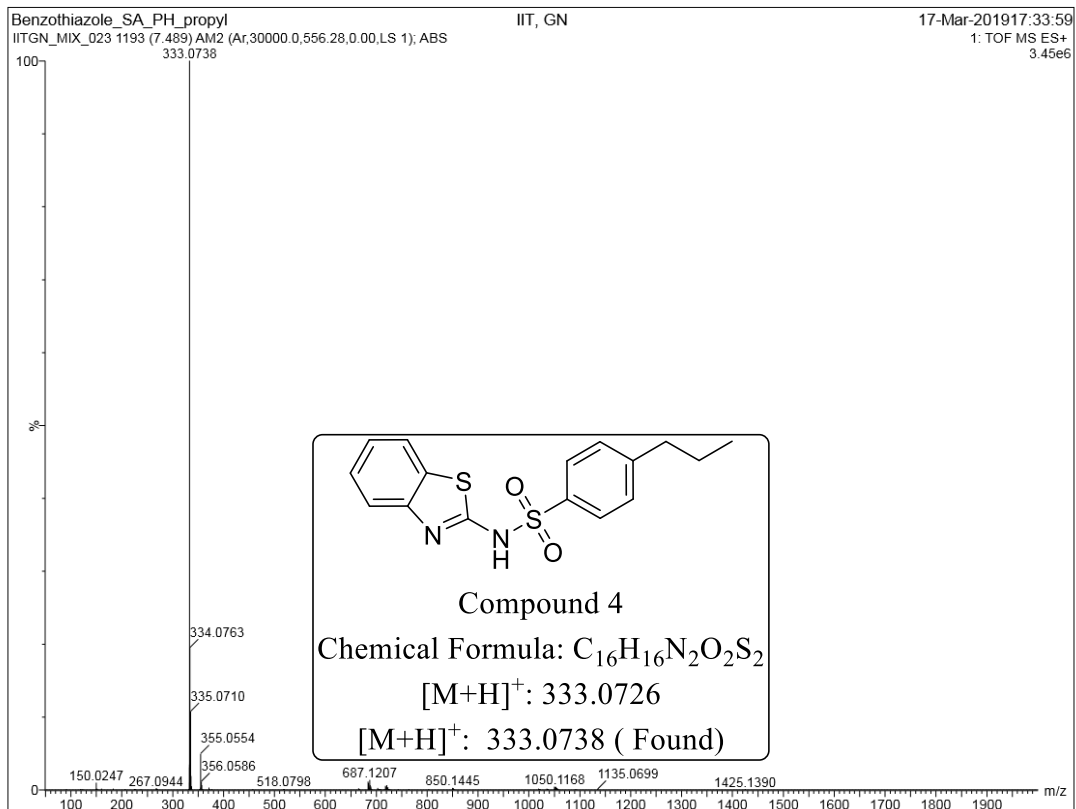

### LC-ESIMS of Compound 4

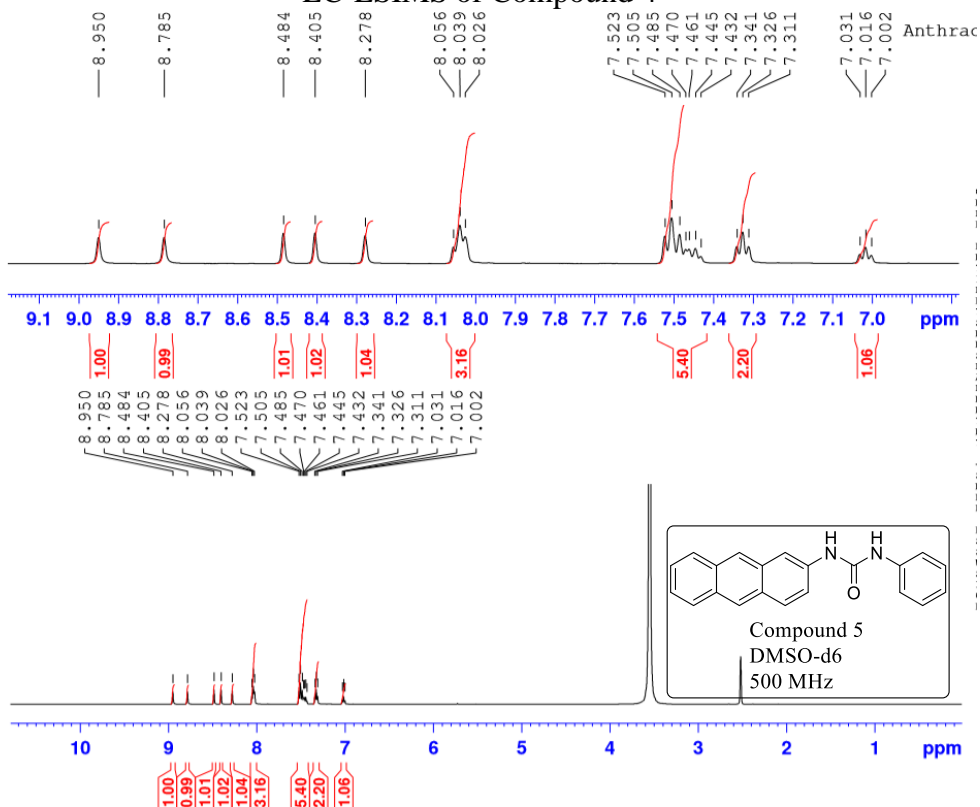

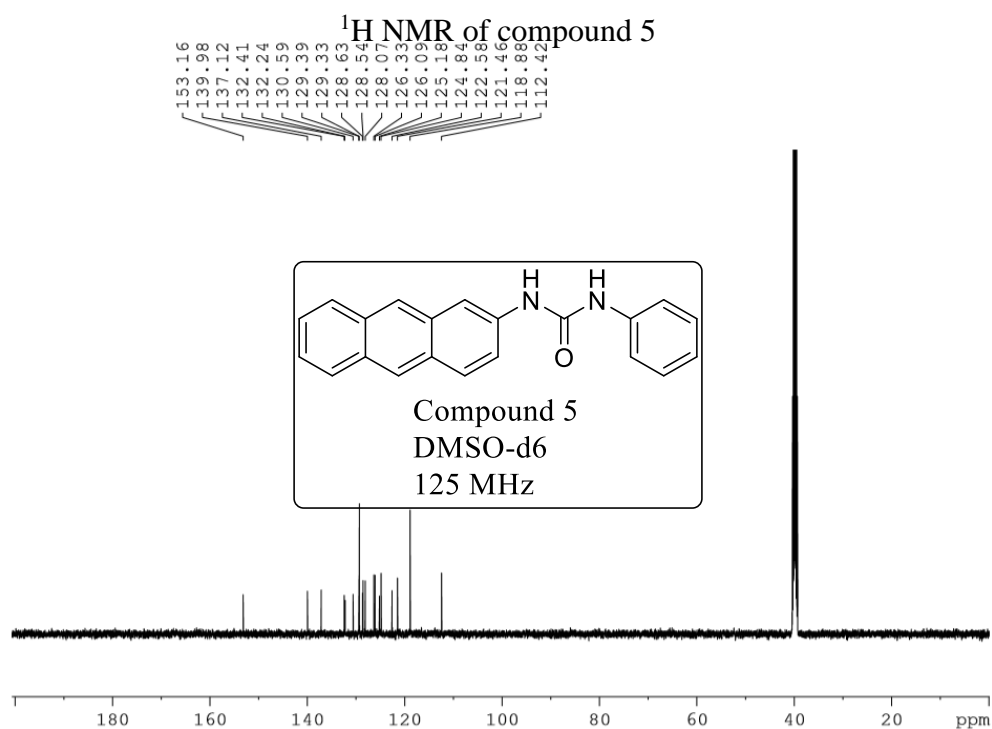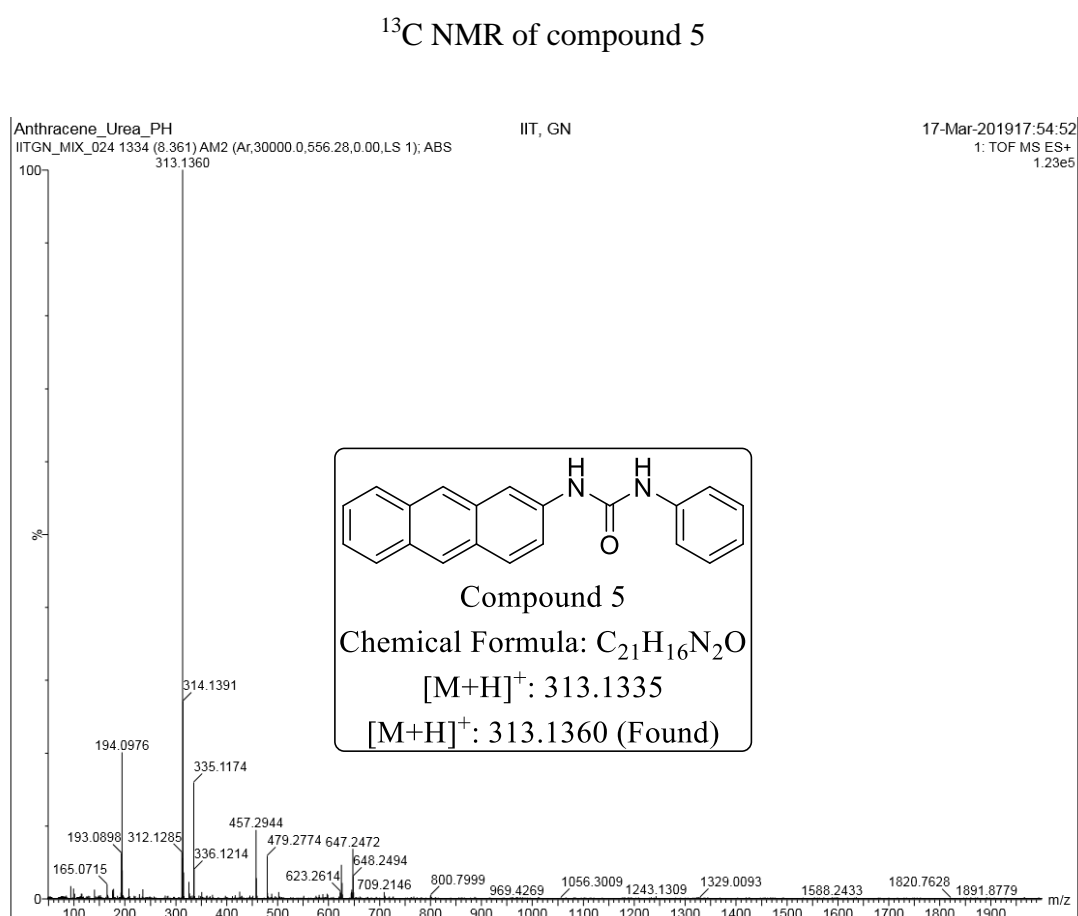



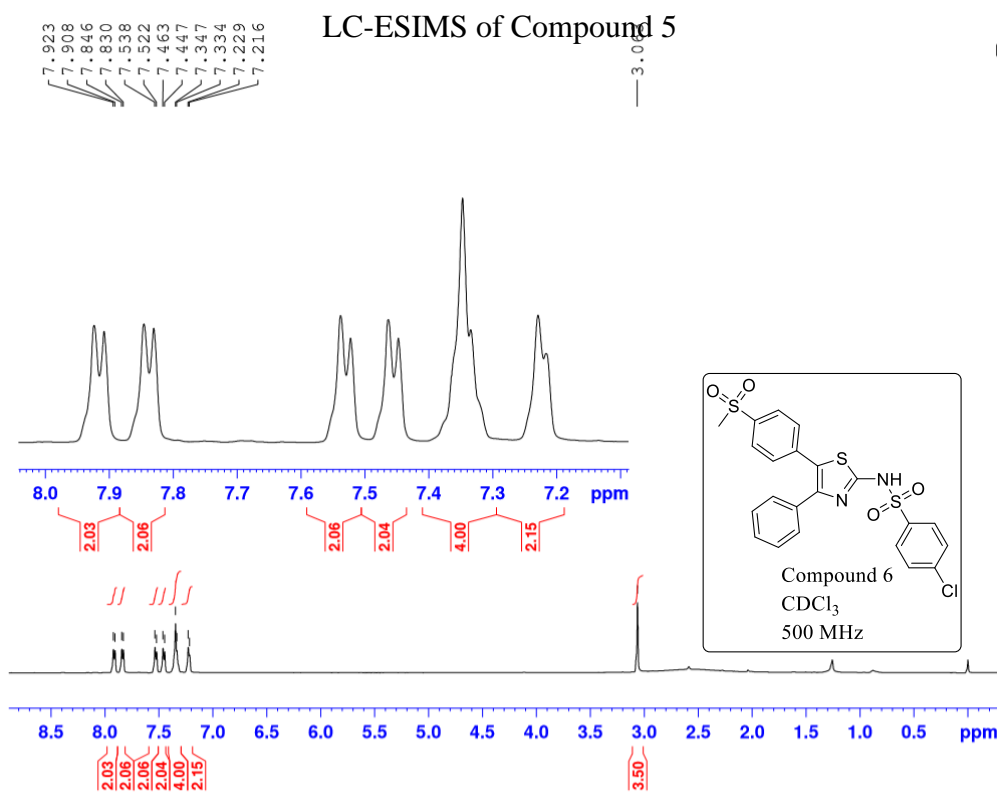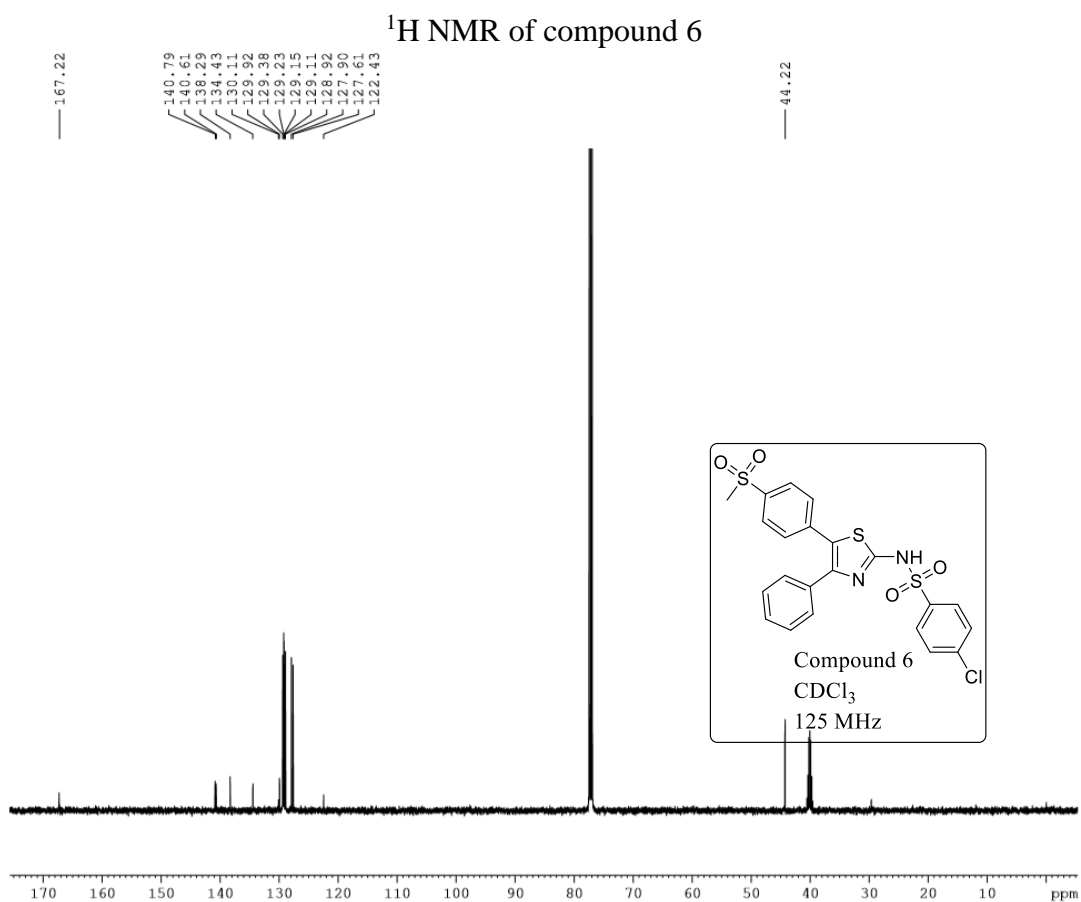

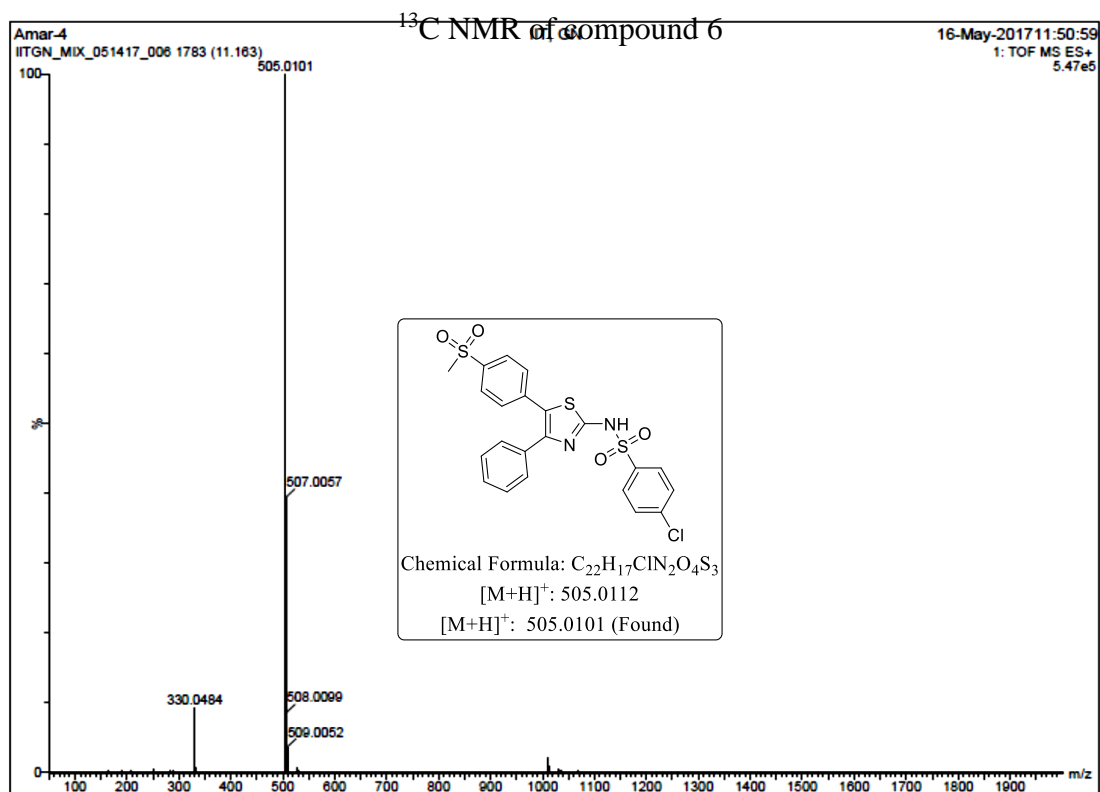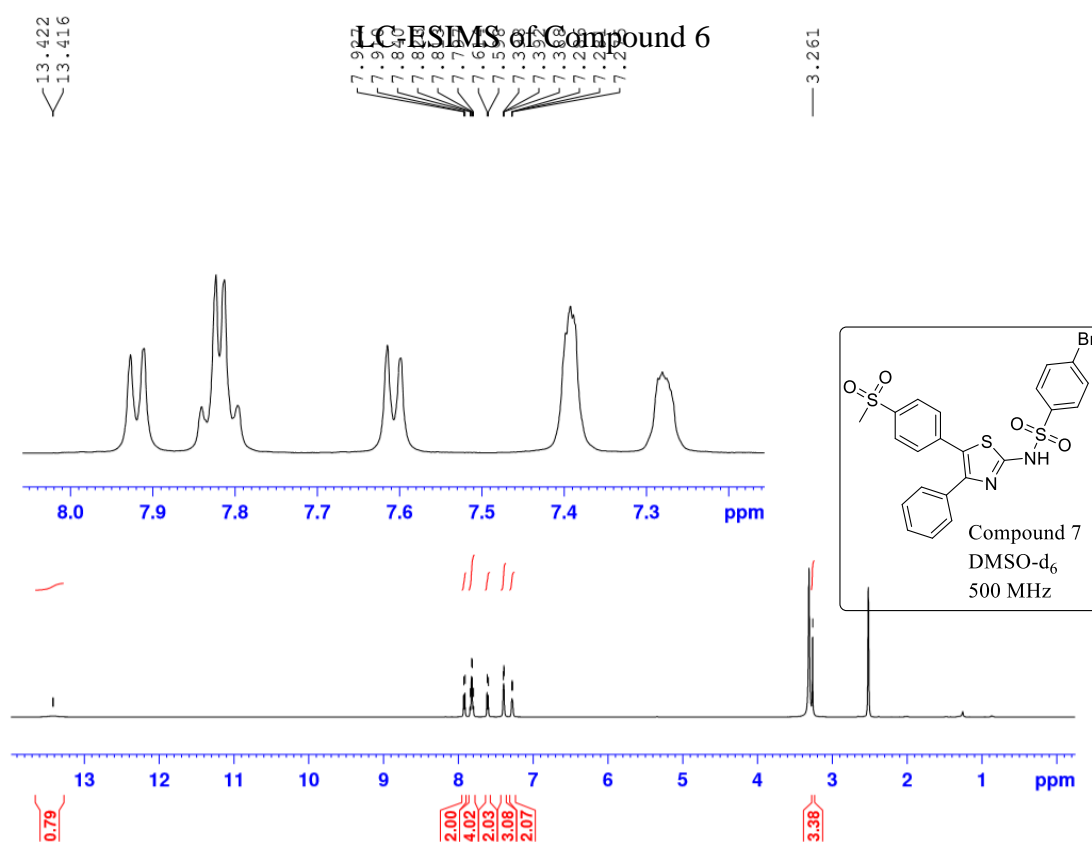

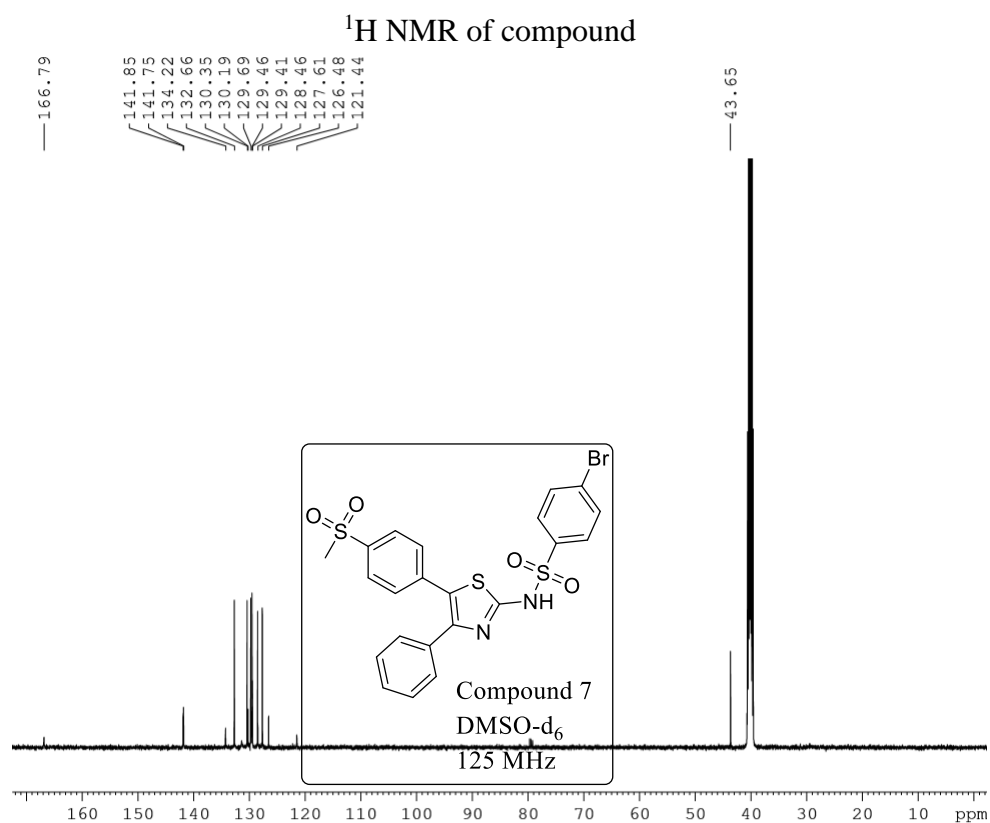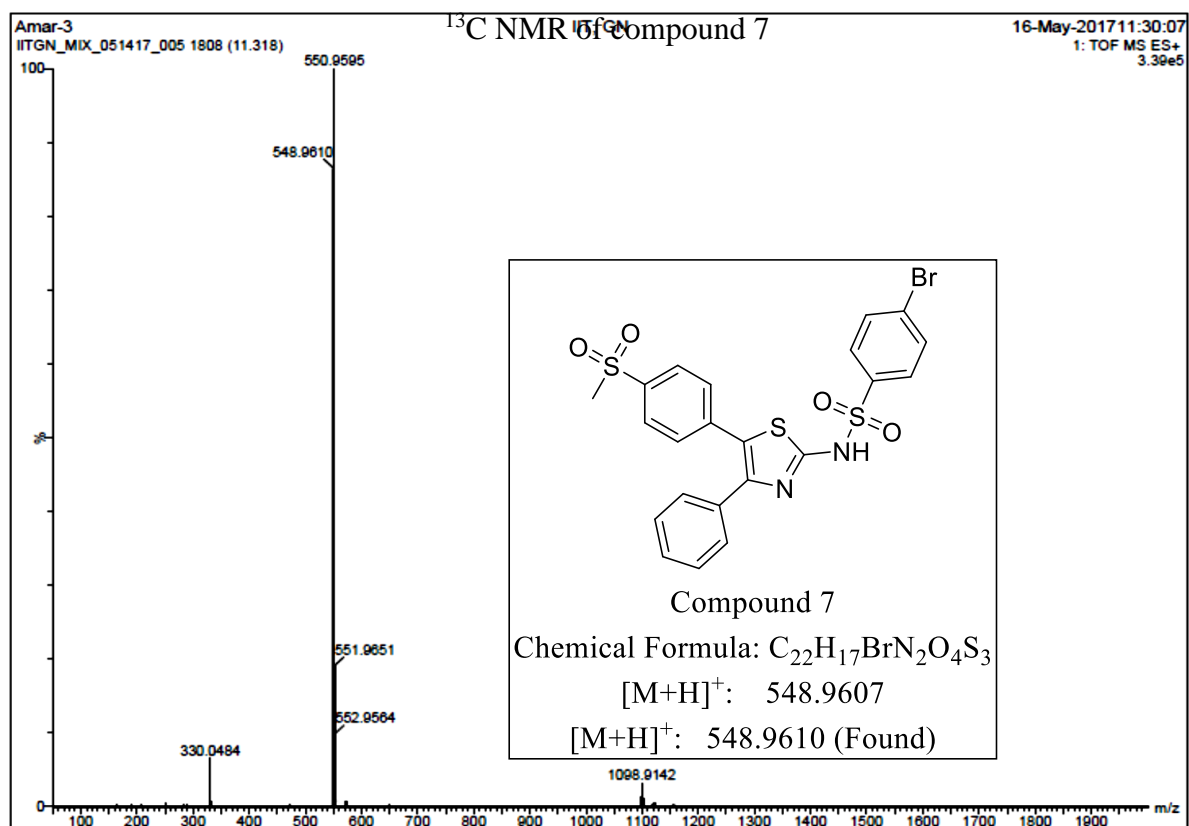

# LC-ESIMS of Compound 7

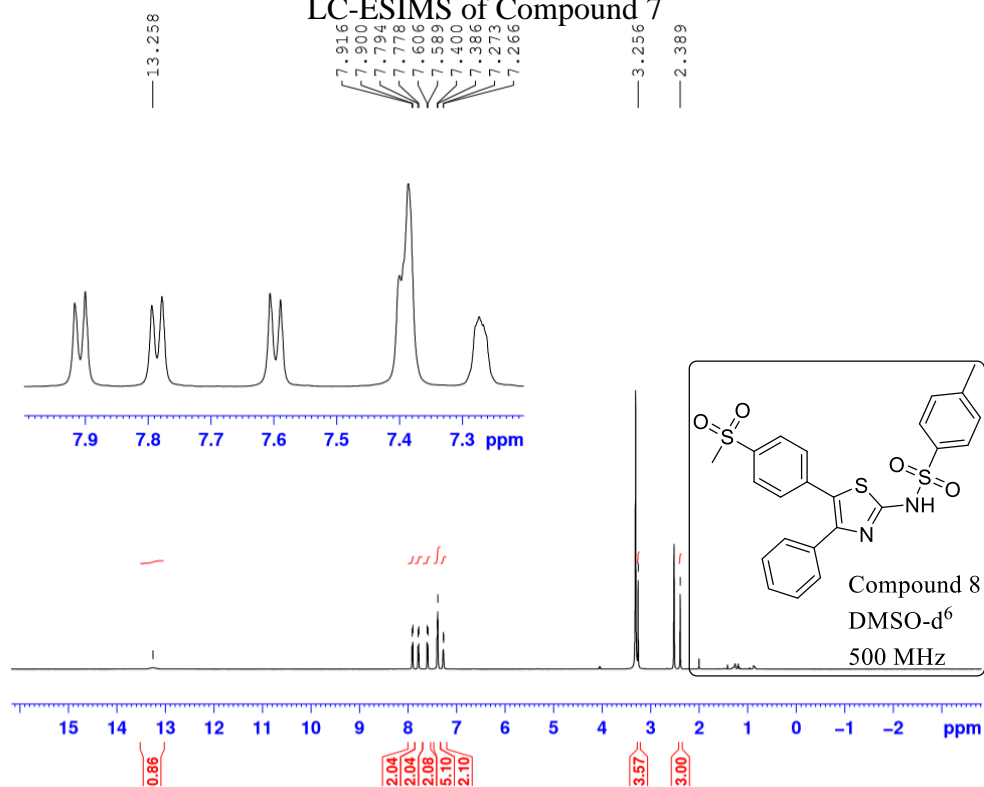

# <sup>1</sup>H NMR of compound 8

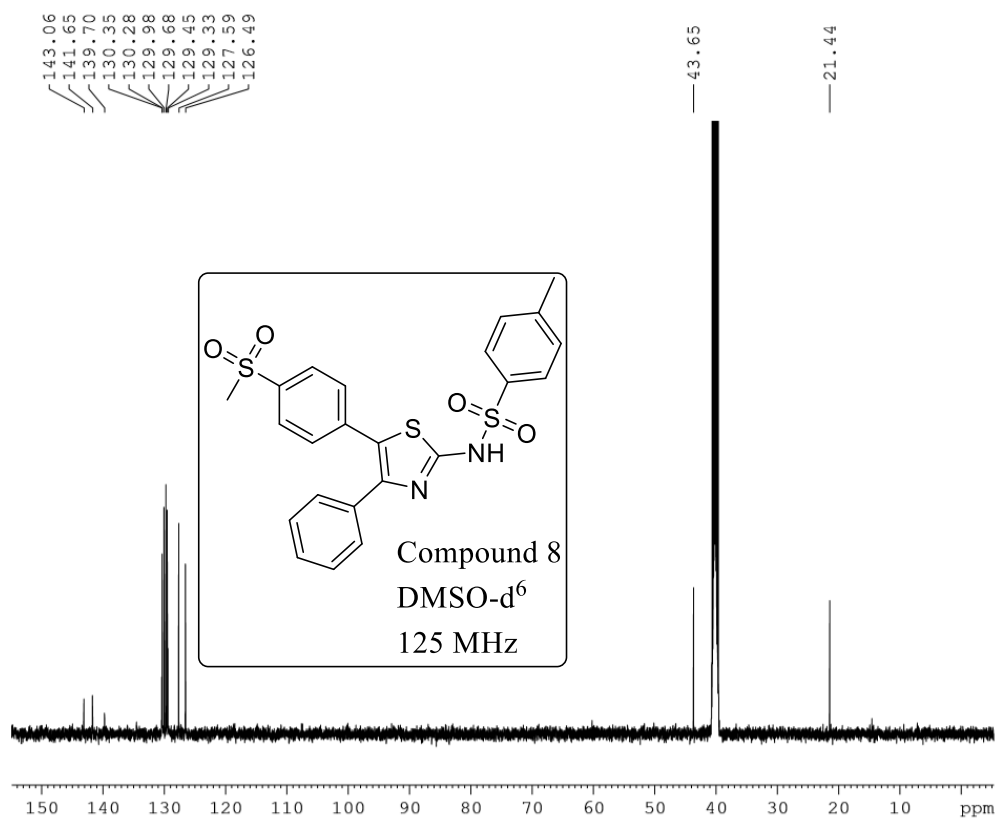

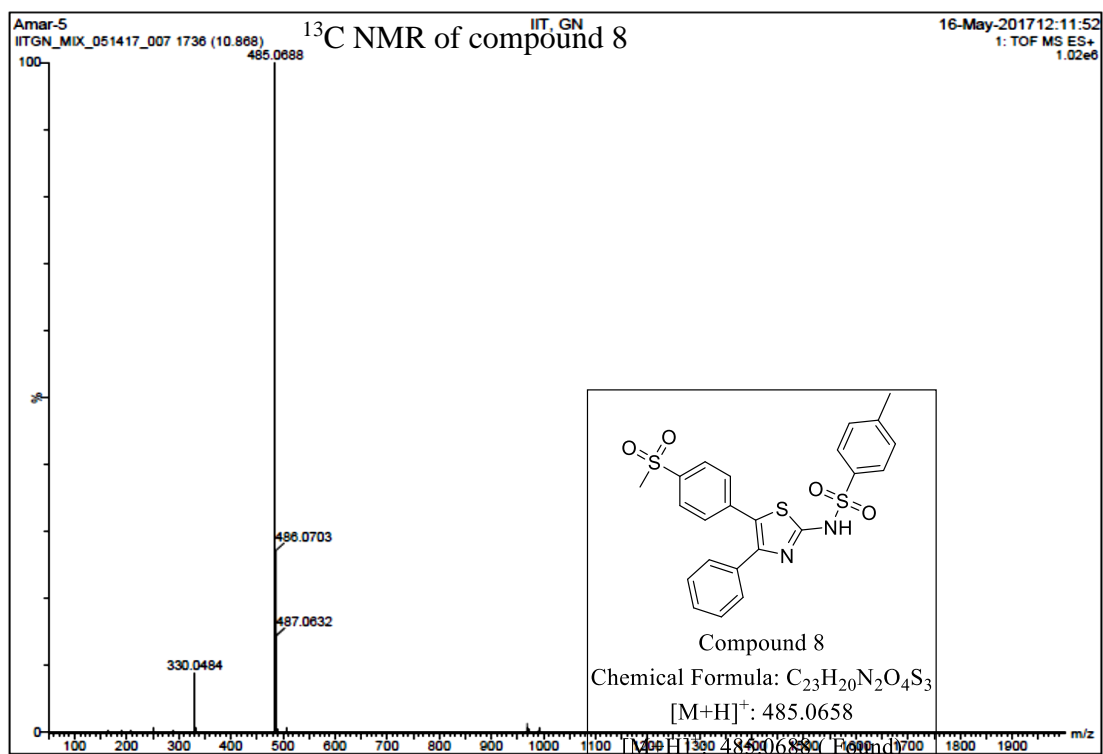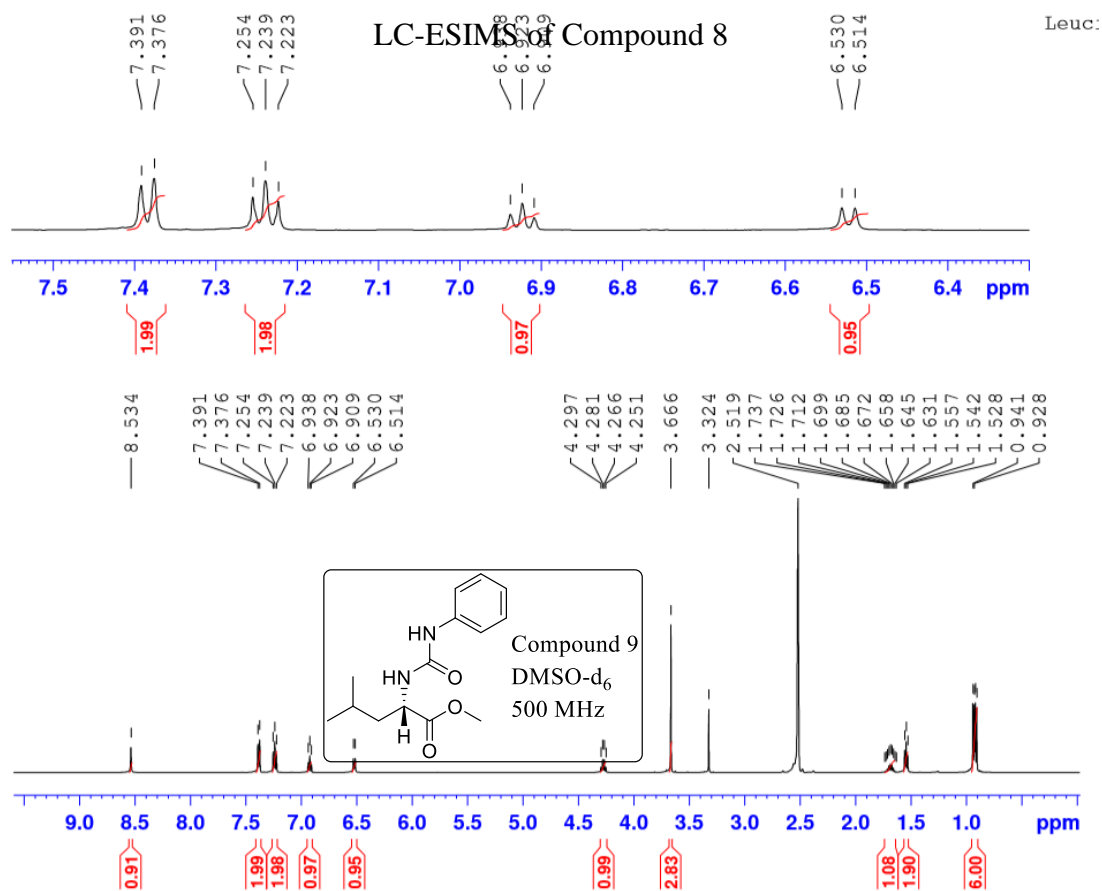

<sup>1</sup>H NMR of compound 9

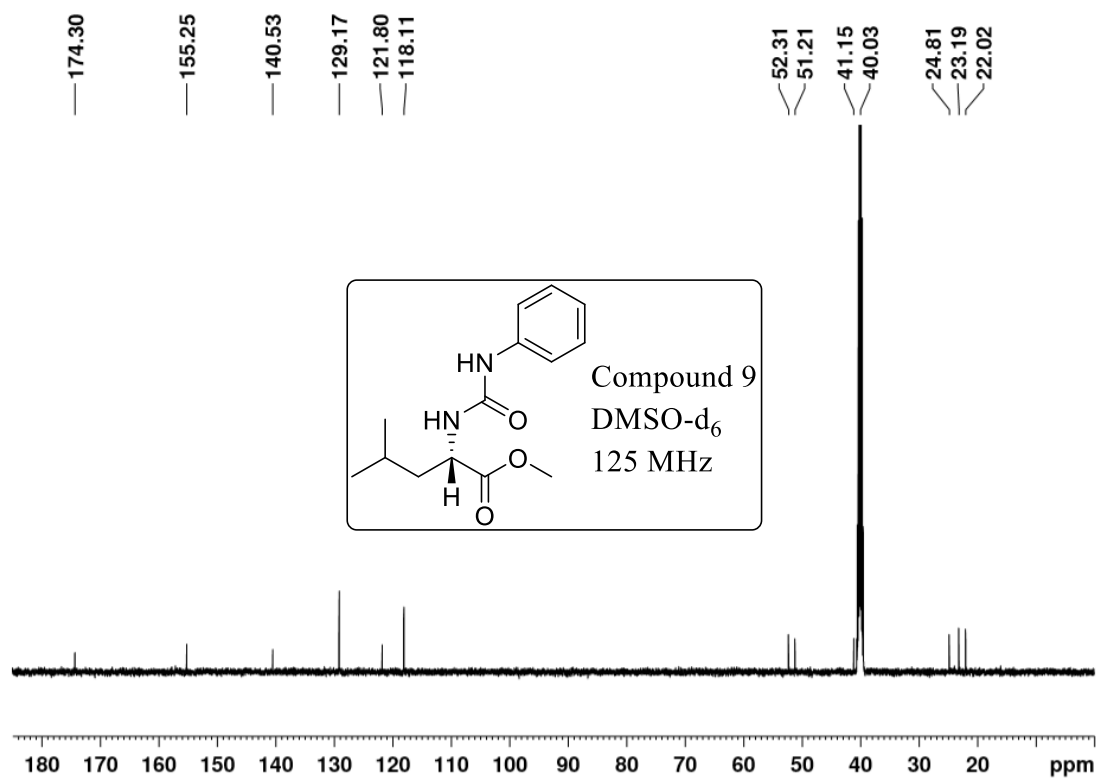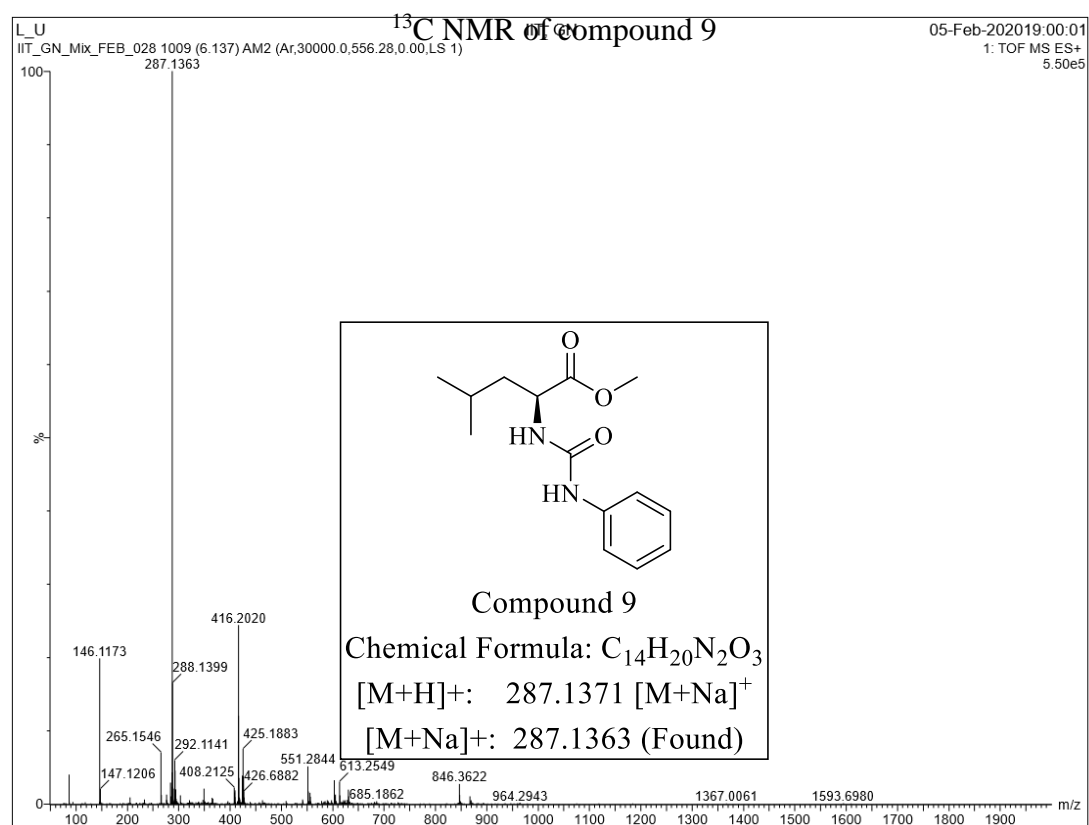

# LC-ESIMS of Compound 9

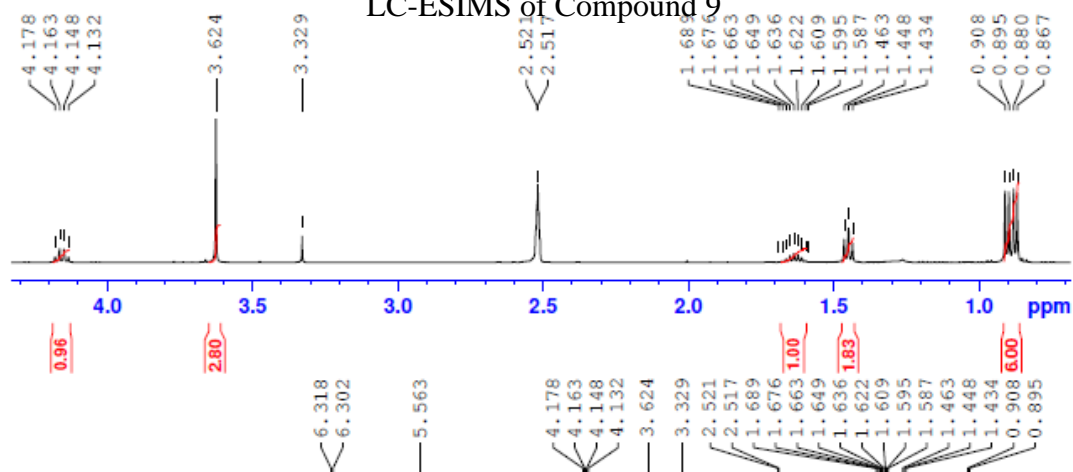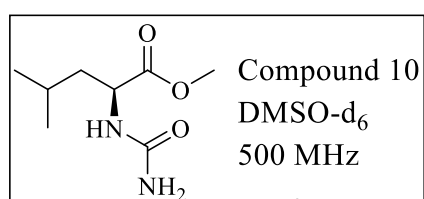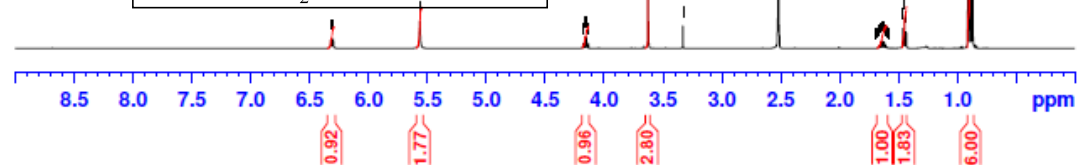

## <sup>1</sup>H NMR of compound 10

174.71  
158.64

52.06  
51.26  
41.32  
40.04  
24.74  
23.19  
22.00

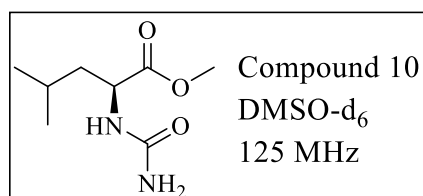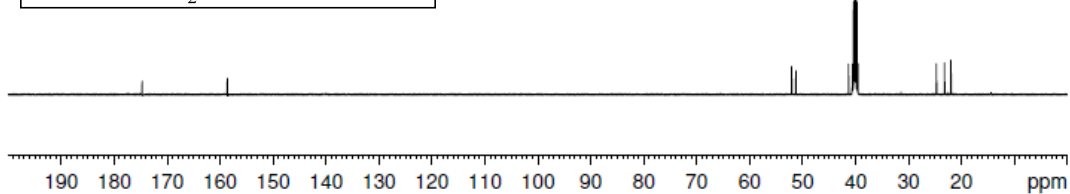

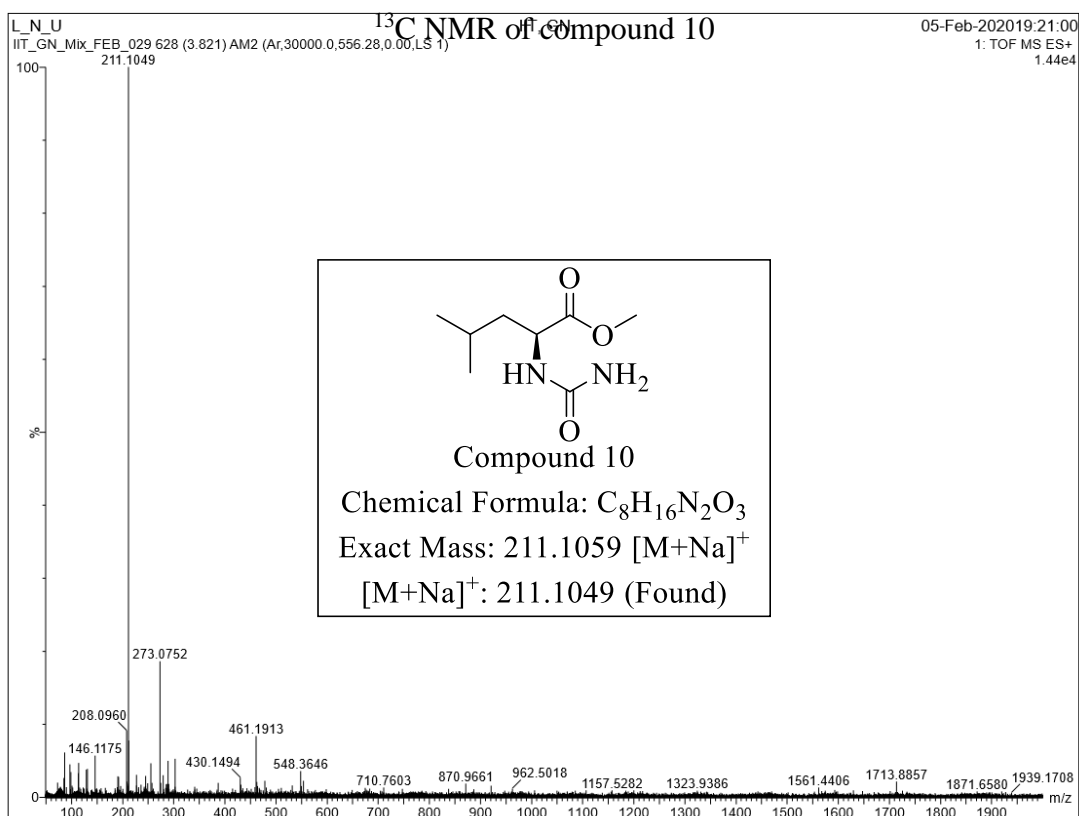

### LC-ESIMS of Compound 10

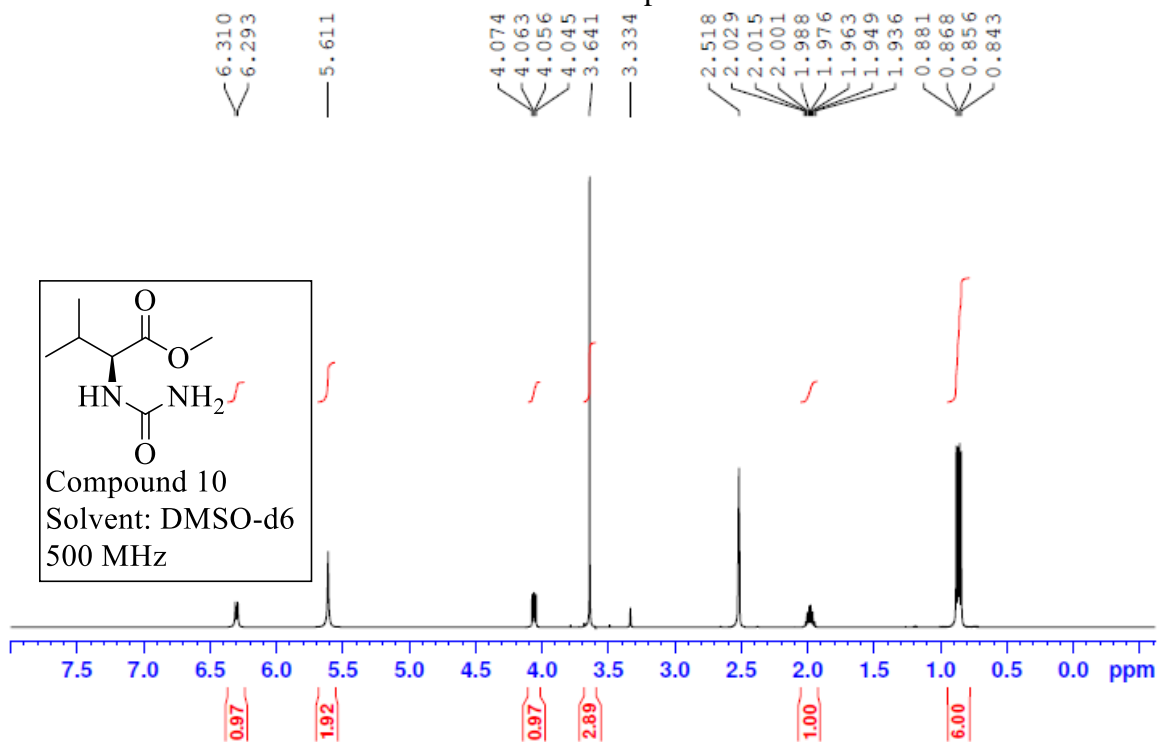



# <sup>1</sup>H NMR of compound 11

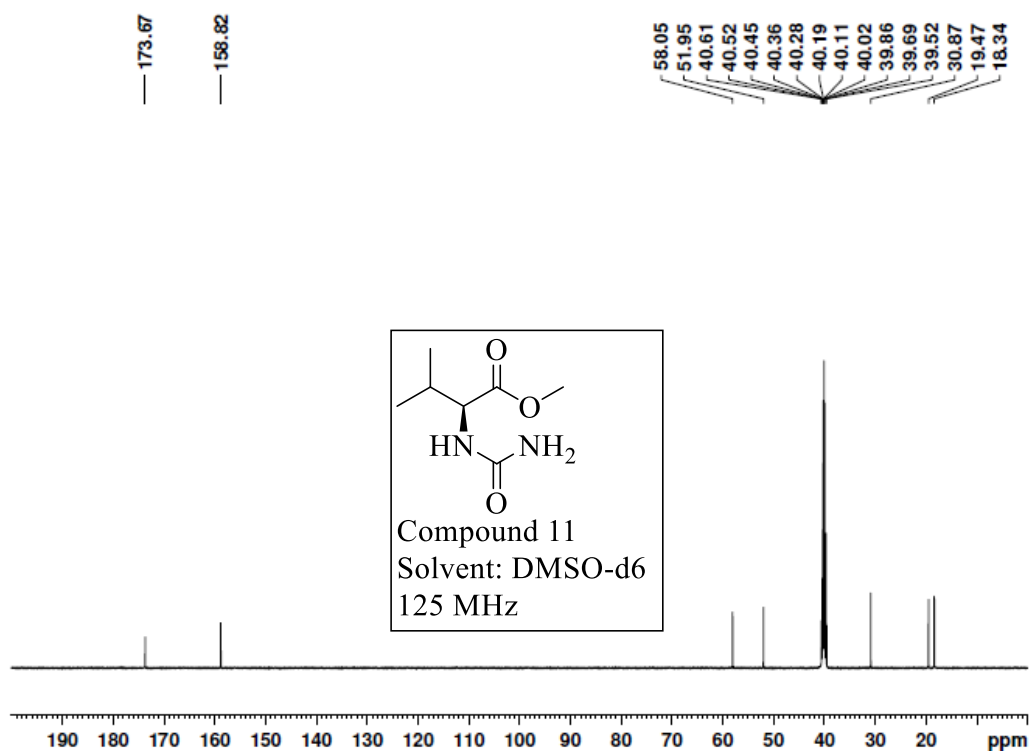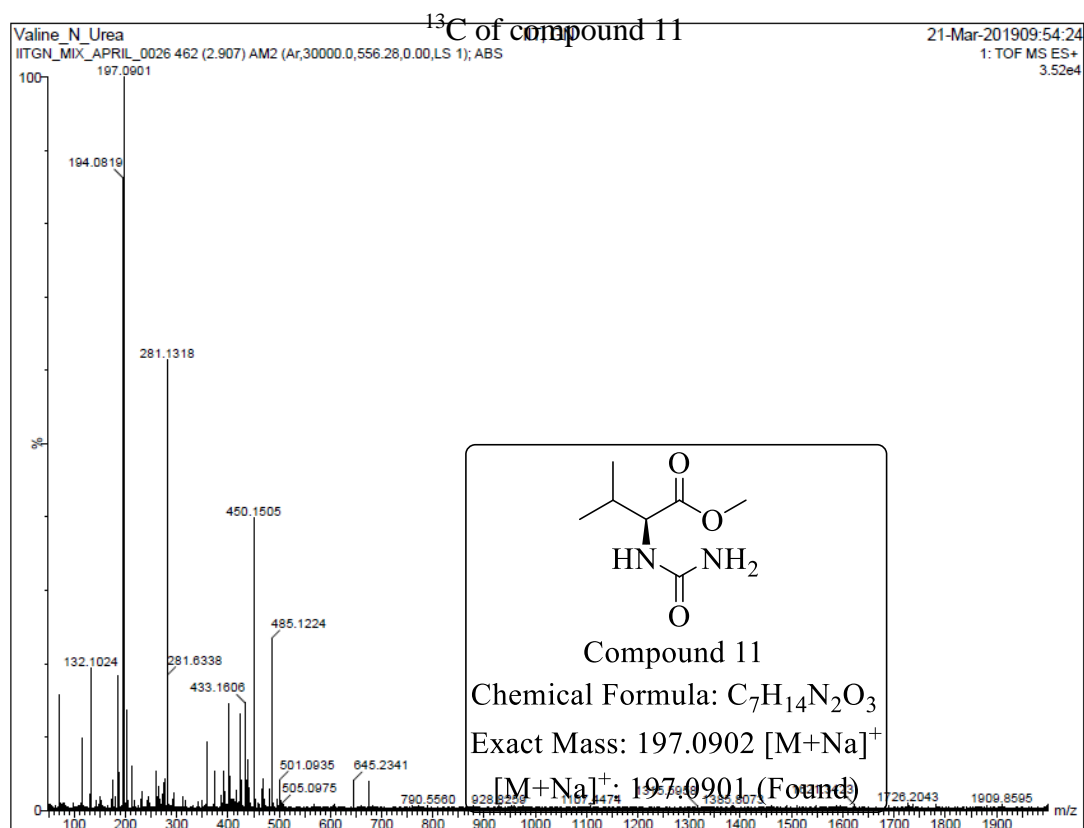

## LC-ESIMS of Compound 11

**Figure S1.** Characterization of all synthesized compounds (1 to 11) by different spectroscopic techniques like  $^1\text{H}$  NMR,  $^{13}\text{C}$  NMR, and LC-MS mass spectrometry.

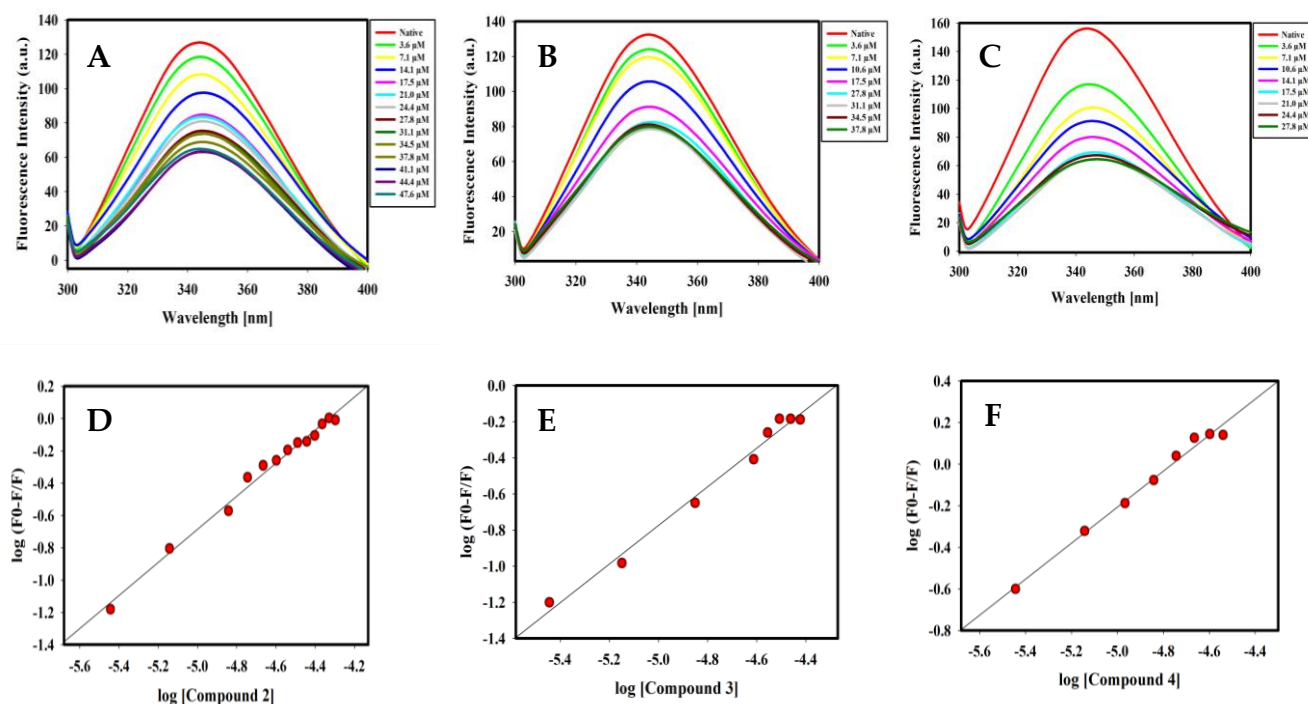

**Figure S2.** Binding studies of compound 2,3 and 4 with SphK1. Fluorescence emission spectra representing SphK1 quenching on the addition of an increasing amount of (A) compound 2 (0–47.6  $\mu\text{M}$ ), (B) compound 3 (0–37.8  $\mu\text{M}$ ) and (C) compound 4 (0–27.8  $\mu\text{M}$ ). SphK1 was excited at 280 nm and emission spectra were recorded in the range of 300–400 nm. Modified Stern-Volmer plot showing quenching of SphK1 fluorescence with increasing concentration of (D) compound 2, (E) compound 3 and (F) compound 4. The SV plot was used to calculate binding constant ( $K_a$ ) and the number of binding sites ( $n$ ).

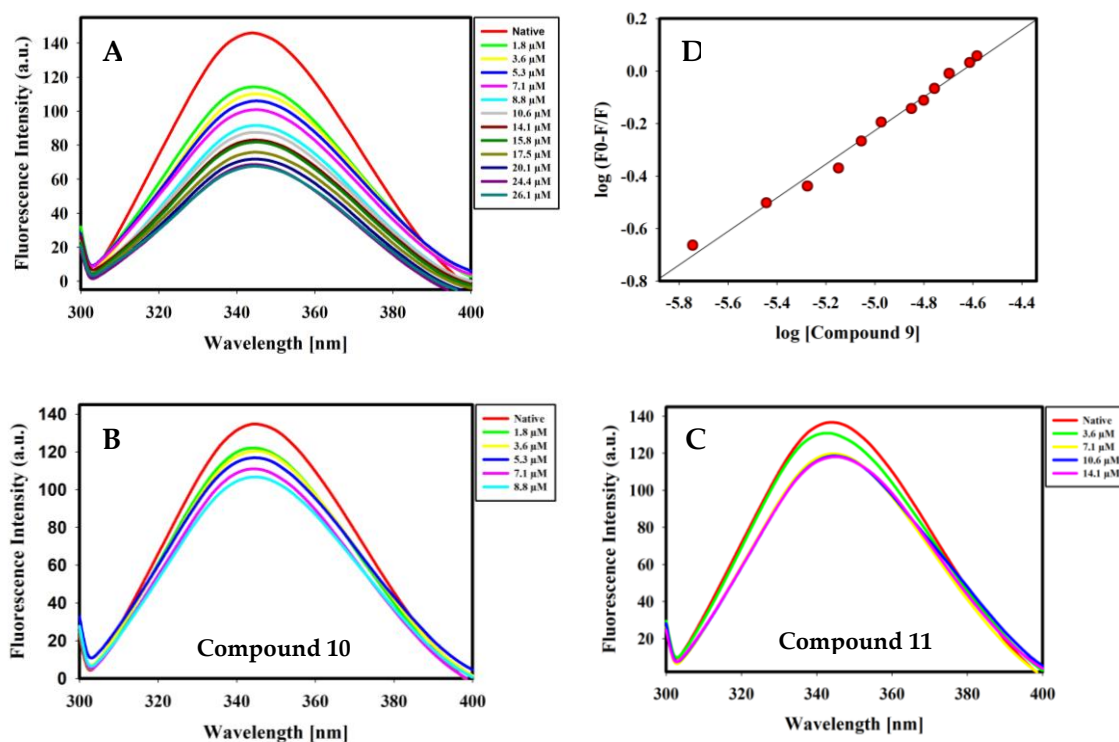

**Figure S3.** Binding studies of compound 9,10 and 11 with SphK1. Fluorescence emission spectra representing SphK1 quenching on the addition of an increasing amount of (A) compound 9 (0–26.1  $\mu$ M), (B) compound 10 (0–8.8  $\mu$ M) and (C) compound 11 (0–14.1  $\mu$ M). SphK1 was excited at 280 nm and emission spectra were recorded in the range of 300–400 nm. (D) Modified Stern-Volmer plot showing quenching of SphK1 fluorescence with increasing concentration of compound 9. The SV plot was used to calculate binding constant ( $K_a$ ) and the number of binding sites ( $n$ ).

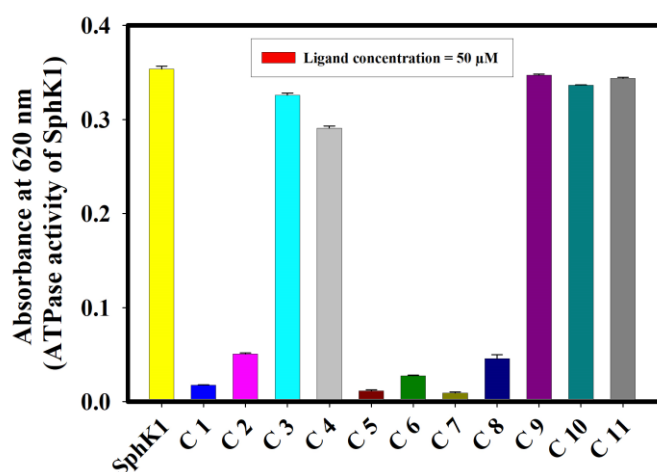

**Figure S4.** Screening of compounds for evaluation of their inhibitory potential against SphK1 by malachite green-based ATPase inhibition assay. The inorganic phosphate released by ATPase activity of SphK1 forms a green complex with the malachite green that absorbs at 620 nm.

**Table S1.** List of different non-covalent interactions between compounds and SphK1 interacting residues.

| S. No. | Interaction type | Participating residues of SphK1 with compounds                                 |                                                      |                                                                             |                                                                        |                                                                             |                                                                                  |
|--------|------------------|--------------------------------------------------------------------------------|------------------------------------------------------|-----------------------------------------------------------------------------|------------------------------------------------------------------------|-----------------------------------------------------------------------------|----------------------------------------------------------------------------------|
|        |                  | Compound 1                                                                     | Compound 5                                           | Compound 6                                                                  | Compound 7                                                             | Compound 8                                                                  | *PF-543                                                                          |
| 1.     | Hydrogen bonds   | Asp 178                                                                        | -                                                    | Thr 196                                                                     | Thr 196                                                                | Thr 196                                                                     | Asp 178, Thr 196, His 311                                                        |
| 2.     | van der Waals    | Met 272, Leu 167, Leu 268, Asp 81, Val 177, Ile 174, Thr 196, Phe 173, Leu 299 | Thr 196, Phe 303, Phe 173, Leu 259, Leu 319, His 311 | Phe 303, Leu 259, Leu 200, Leu 302, Leu 319, Phe 288, His 311, Ala 274, Leu | Met 272, Val 177, Phe 288, His 311, Leu 319, Leu 259, Leu 302, Val 290 | Phe 303, Leu 200, Leu 259, Leu 302, Leu 319, Phe 288, His 311, Ala 274, Leu | Phe 288, Leu 259, Leu 302, Leu 261, Val 290, Met 306, Ala 170, Ala 339, Gly 342, |

|    |                           |                                                                  |                                                                     |                                                      |                                                      |                                                      |                                                                                             |
|----|---------------------------|------------------------------------------------------------------|---------------------------------------------------------------------|------------------------------------------------------|------------------------------------------------------|------------------------------------------------------|---------------------------------------------------------------------------------------------|
|    |                           |                                                                  |                                                                     | 261, Met<br>272, Val 177                             |                                                      | 261, Met<br>272, Val 177                             | Leu 167,<br>Ser 168                                                                         |
| 3. | <b>Pi-Sigma</b>           | -                                                                | -                                                                   | -                                                    | -                                                    | -                                                    | Phe 192                                                                                     |
| 4. | <b>Pi-Alkyl</b>           | Ala 115, Leu<br>319, His<br>311, Phe<br>288, Met<br>306, Leu 259 | Ile 174, Val<br>177, Met<br>272, Leu<br>268, Leu<br>302, Met<br>306 | Ala 115,<br>Leu 167,<br>Leu 268, Ile<br>174, Leu 299 | Leu 268, Ile<br>174, Met<br>306, Leu<br>200, Leu 299 | Ala 115, Leu<br>167, Leu<br>268, Ile 174,<br>Leu 299 | Ala 274,<br>Leu 319,<br>Leu 200,<br>Leu 299,<br>Phe 173,<br>Val 177, Ile<br>174, Leu<br>268 |
| 5. | <b>Pi-Sulfur</b>          | Phe 303                                                          |                                                                     | Met 306                                              | Phe 303                                              | Met 306                                              | Met 272                                                                                     |
| 6. | <b>Pi-Anion</b>           | -                                                                | Asp 178                                                             | Asp 178                                              | Asp 178                                              | Asp 178                                              | -                                                                                           |
| 7. | <b>Pi- Pi<br/>Stacked</b> | Phe 192                                                          | Phe 192                                                             | Phe 173,<br>Phe 192                                  | Phe 173,<br>Phe 192                                  | Phe 173,<br>Phe 192                                  | Phe 303                                                                                     |

\*PF-543 is used as a reference compound in docking experiments for comparison of the binding pattern observed for compounds under investigation.
